# Supplementary material for: High thermoelectric efficiency in electrodeposited silver selenide films: from Pourbaix diagram to a flexible thermoelectric module
Source: Royal Society of Chemistry journal article supplement (doi:10.1039/d1se01061a), 2021-01-01
Supplement: d1se01061a1.pdf [file d1se01061a1.pdf]

## Supporting information

### High $zT$ in Electrodeposited Silver Selenide Films: From Pourbaix Diagram to a Flexible Thermoelectric Module

Cristina V. Manzano<sup>1,\*</sup>, Cristina Llorente del Olmo<sup>1</sup>, Olga Caballero-Calero<sup>1</sup>,

Marisol Martín-González<sup>1,\*</sup>

<sup>1</sup> Instituto de Micro y Nanotecnología, IMN-CNM, CSIC (CEI UAM+CSIC) Isaac Newton, 8, E-28760, Tres Cantos, Madrid, Spain

Table S1. Harris texture coefficient and standard deviation silver selenide films grown at different reduction potentials.

| Reduction potential | Peak ( <i>hkl</i> ) | Intensity XRD | Intensity JCPDS | Texture coefficient ( $TC_{(hkl)}$ ) | Standard deviation( $\sigma$ ) |
|---------------------|---------------------|---------------|-----------------|--------------------------------------|--------------------------------|
| 0.084 V             | 020                 | 8             | 1.1             | 1.65                                 | 0.73                           |
|                     | 112                 | 22            | 21              | 0.24                                 |                                |
|                     | 200                 | 14            | 4.1             | 2.27                                 |                                |
|                     | 023                 | 93            | 22.9            | 0.92                                 |                                |
|                     | 211                 | 18            | 11              | 0.37                                 |                                |
|                     | 040                 | 10            | 4.1             | 0.55                                 |                                |
| 0.078 V             | 020                 | 3             | 1.1             | 0.39                                 | 1.33                           |
|                     | 112                 | 18            | 21              | 0.12                                 |                                |
|                     | 200                 | 38            | 4.1             | 3.91                                 |                                |
|                     | 023                 | 163           | 22.9            | 1.03                                 |                                |
|                     | 211                 | 26            | 11              | 0.34                                 |                                |
|                     | 040                 | 6             | 4.1             | 0.21                                 |                                |
| 0.071 V             | 020                 | 6             | 1.1             | 0.76                                 | 1.07                           |
|                     | 112                 | 16            | 21              | 0.11                                 |                                |
|                     | 200                 | 33            | 4.1             | 3.30                                 |                                |
|                     | 023                 | 159           | 22.9            | 0.97                                 |                                |
|                     | 211                 | 22            | 11              | 0.28                                 |                                |
|                     | 040                 | 17            | 4.1             | 0.58                                 |                                |
| 0.044 V             | 020                 | 9             | 1.1             | 1.14                                 | 0.87                           |
|                     | 112                 | 16            | 21              | 0.11                                 |                                |
|                     | 200                 | 26            | 4.1             | 2.59                                 |                                |
|                     | 023                 | 239           | 22.9            | 1.45                                 |                                |
|                     | 211                 | 15            | 11              | 0.06                                 |                                |
|                     | 040                 | 19            | 4.1             | 0.64                                 |                                |
| -0.015 V            | 020                 | 4             | 1.1             | 0.37                                 | 1.16                           |
|                     | 112                 | 10            | 21              | 0.05                                 |                                |
|                     | 200                 | 42            | 4.1             | 3.08                                 |                                |
|                     | 023                 | 464           | 22.9            | 2.08                                 |                                |
|                     | 211                 | 26            | 11              | 0.24                                 |                                |
|                     | 040                 | 7             | 4.1             | 0.18                                 |                                |
